# Supplementary material for: Therapeutic Potential of Sclareol in Experimental Models of Rheumatoid Arthritis
Source: MDPI journal article supplement (doi:10.3390/ijms19051351), 2018-05-03
Supplement: s1 [file s1]

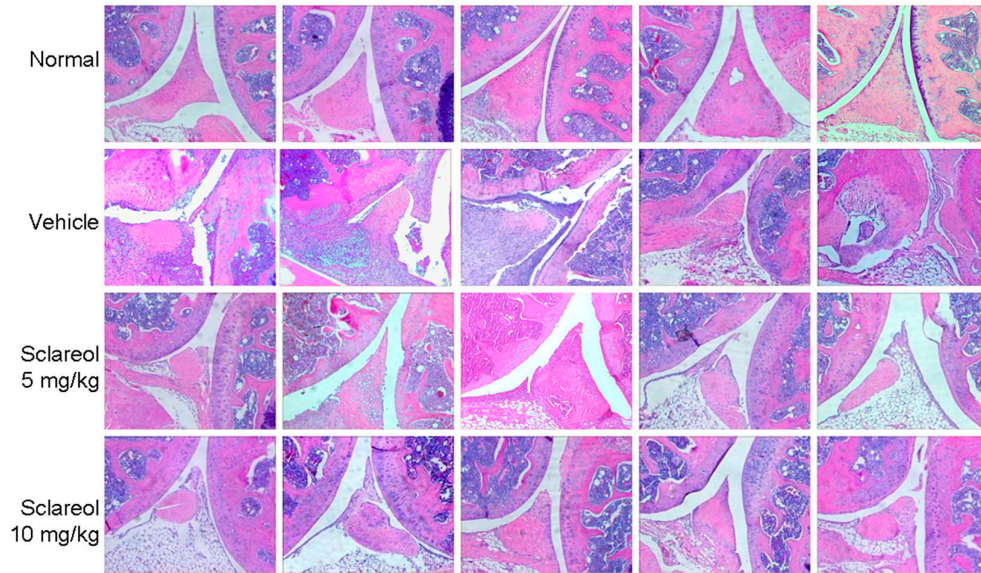

**Supplementary Figure 1.** Histologic analysis of knee joints in mice on day 42. (A) Paraffin-embedded knee sections were stained with hematoxylin and eosin. Original magnification  $\times 100$ .

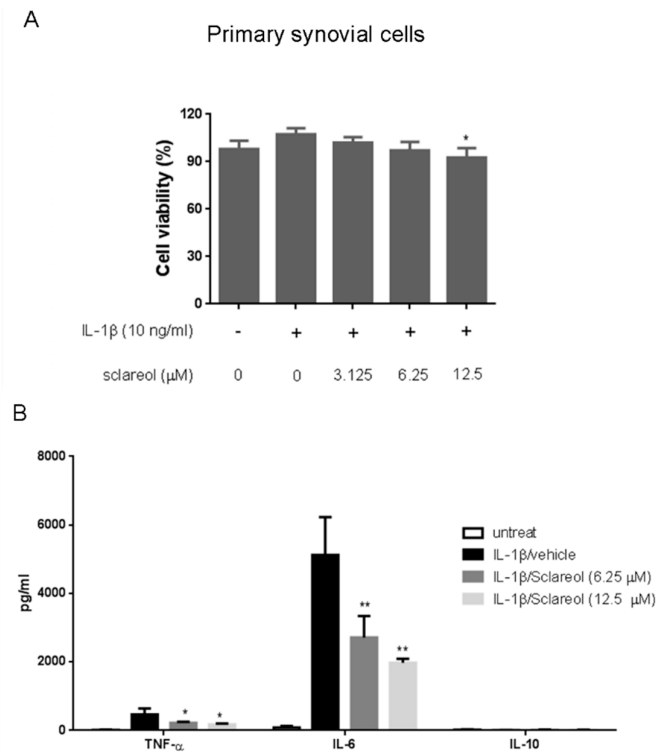

**Supplementary Figure 2.** Effect of sclareol on cell viability and cytokines production in human synovial fibroblast primary cells. Cells were stimulated with 10 ng/mL IL-1 $\beta$  with or without for sclareol for 72 h. (A) The cell proliferation of human synovial fibroblast primary cells was evaluated with the CCK-8 assay. (B) The cytokine levels in culture supernatant were examined by ELISA. Bar graphs represent the mean  $\pm$  SD of triplicate tests. \* $p < 0.05$  and \*\* $p < 0.01$  versus DMSO-treated vehicle group. The data are representative of three independent experiments with similar results.
